# Supplementary material for: Palladium supported on chitosan as a recyclable and selective catalyst for the synthesis of 2-phenyl ethanol
Source: Royal Society of Chemistry journal article supplement (doi:10.1039/c2dt11924b), 2012-01-01
Supplement: c2dt11924b.pdf [file c2dt11924b.pdf]

### Supplementary Information

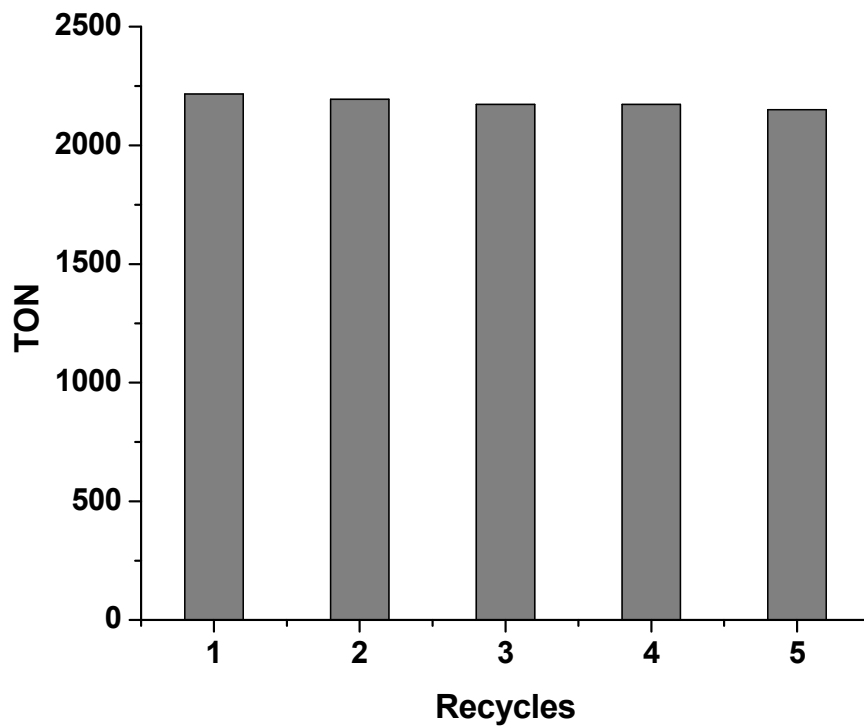

**Fig. S1** Catalyst (AFCTS-2Pd) recycles experiments.

Reaction conditions: styrene oxide = 25 mmol, substrate/Pd = 2216, Temp. = 40 °C, hydrogen pressure = 2.0 MPa, solvent (methanol) = 30 mL, reaction time = 105 min
